# Supplementary material for: New Pyridinium Type Poly(Ionic Liquids) as Membranes for CO2 Separation
Source: MDPI journal article supplement (doi:10.3390/polym10080912), 2018-08-13
Supplement: s1 [file s1]

## Supporting Information

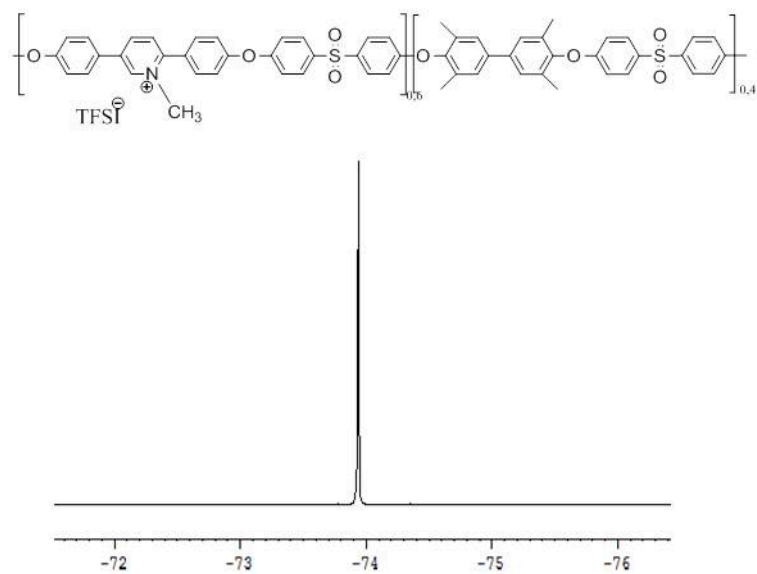

Figure S1.  $^{19}\text{F}$ NMR spectrum for PIL containing TFSI $^{-}$  as counter anion.

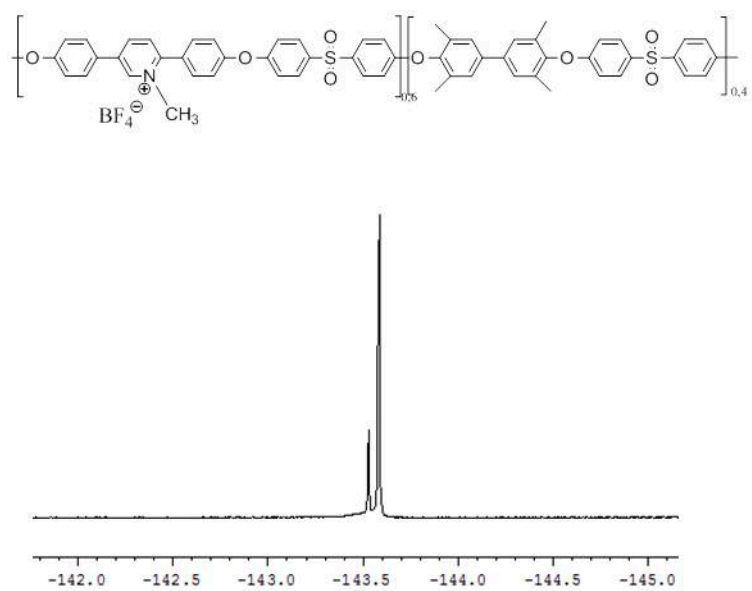

Figure S2.  $^{19}\text{F}$ NMR spectrum for PIL containing  $\text{BF}_4^-$  as counter anion.
